# Supplementary material for: Different Modulatory Effects of Four Methicillin-Resistant Staphylococcus aureus Clones on MG-63 Osteoblast-Like Cells
Source: MDPI journal article supplement (doi:10.3390/biom11010072), 2021-01-07
Supplement: s1 [file s1]

## Supplementary Materials

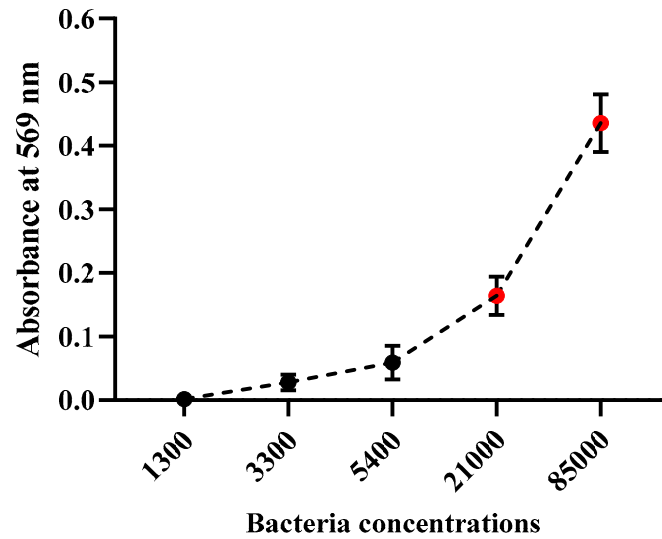

**Supplementary Figure S1.** Changes in absorbance values measured at 569 nm at five different concentrations of free bacteria. The red circles indicate the concentrations at which the bacteria metabolize a significant amount of MTT salt. Values are reported as means  $\pm$  SD of three measurements.

**Supplementary Table S1.** Additional statistics regarding the comparison of spots counting measured under all our experimental conditions. Only percentages belonging to the same spot category were compared.

| <b>Bonferroni Multiple Comparisons Test</b> | <b><i>p</i>-value</b> |
|---------------------------------------------|-----------------------|
| ST30:0 spots vs. ST239:0 spots              | >0.9999               |
| ST30:0 spots vs. ST5:0 spots                | <0.0001               |
| ST30:0 spots vs. ST228:0 spots              | <0.0001               |
| ST30:0 spots vs. ST22:0 spots               | >0.9999               |
| ST30:1–5 spots vs. ST239:1–5 spots          | >0.9999               |
| ST30:1–5 spots vs. ST5:1–5 spots            | <0.0001               |
| ST30:1–5 spots vs. ST228:1–5 spots          | <0.0001               |
| ST30:1–5 spots vs. ST22:1–5 spots           | >0.9999               |
| ST30:>5 spots vs. ST239:>5 spots            | >0.9999               |
| ST30:>5 spots vs. ST5:>5 spots              | >0.9999               |
| ST30:>5 spots vs. ST228:>5 spots            | >0.9999               |
| ST30:>5 spots vs. ST22:>5 spots             | >0.9999               |
| ST239:0 spots vs. ST5:0 spots               | <0.0001               |
| ST239:0 spots vs. ST228:0 spots             | <0.0001               |
| ST239:0 spots vs. ST22:0 spots              | >0.9999               |
| ST239:1–5 spots vs. ST5:1–5 spots           | <0.0001               |
| ST239:1–5 spots vs. ST228:1–5 spots         | <0.0001               |
| ST239:1–5 spots vs. ST22:1–5 spots          | >0.9999               |
| ST239:>5 spots vs. ST5:>5 spots             | >0.9999               |
| ST239:>5 spots vs. ST228:>5 spots           | >0.9999               |
| ST239:>5 spots vs. ST22:>5 spots            | >0.9999               |
| ST5:0 spots vs. ST228:0 spots               | >0.9999               |
| ST5:0 spots vs. ST22:0 spots                | <0.0001               |
| ST5:1–5 spots vs. ST228:1–5 spots           | >0.9999               |
| ST5:1–5 spots vs. ST22:1–5 spots            | <0.0001               |
| ST5:>5 spots vs. ST228:>5 spots             | >0.9999               |
| ST5:>5 spots vs. ST22:>5 spots              | >0.9999               |
| ST228:0 spots vs. ST22:0 spots              | <0.0001               |
| ST228:1–5 spots vs. ST22:1–5 spots          | <0.0001               |
| ST228:>5 spots vs. ST22:>5 spots            | >0.9999               |

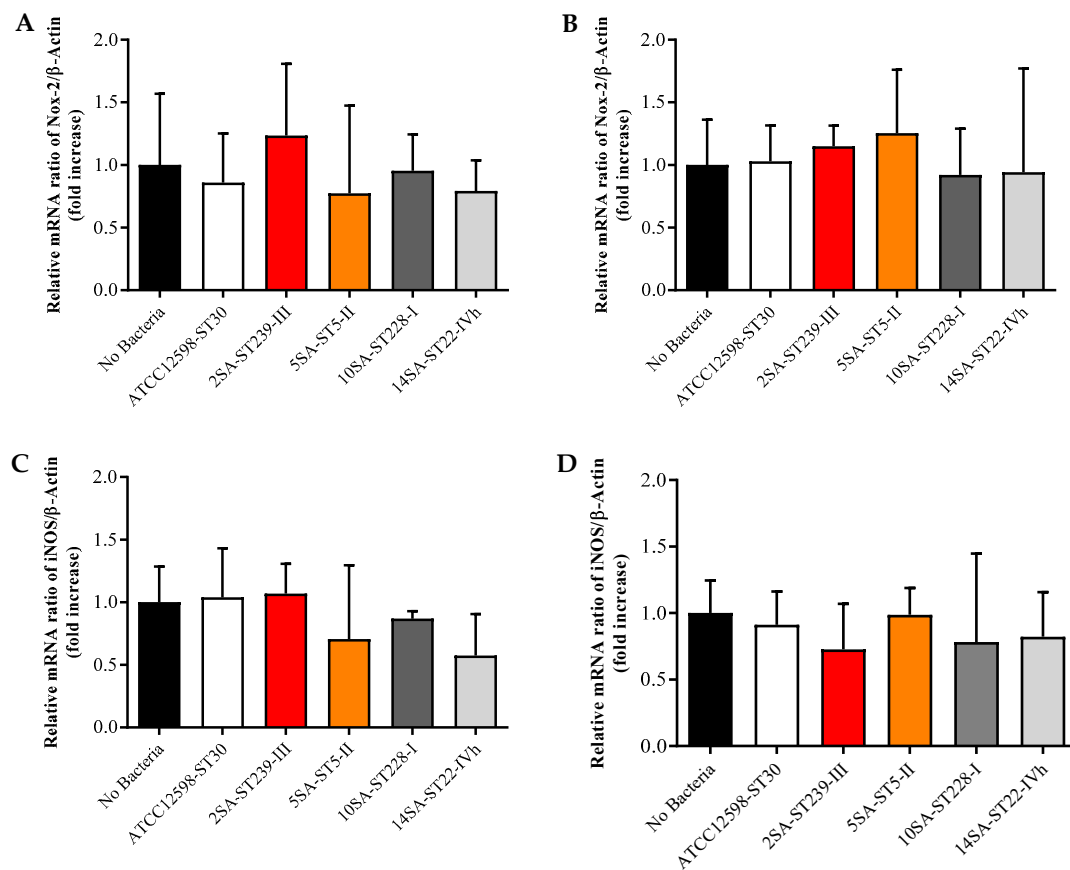

**Supplementary Figure S2.** Gene expression of Nox-2 (A,B) and iNOS (C,D) in uninfected (no bacteria) MG-63 osteoblast-like cells and in MG-63 cells infected at a MOI of 100:1 with five different *S. aureus* strains detected at 3 and 24 h. The abundance of each mRNA is expressed relative to the abundance of  $\beta$ -actin-mRNA. Values are means  $\pm$  SD of three independent experiments.
